# Supplementary material
Source: MDPI journal article supplement (https://www.mdpi.com/2227-9040/9/4/80)
Supplement: s1 [file s1]

## Supplementary Data

**Z-Average (d.nm):** 73.22  
**Pdl:** 0.234  
**Intercept:** 0.888  
**Result quality :** Good

|         | Size (d.nm): | % Number: | St Dev (d.nm): |
|---------|--------------|-----------|----------------|
| Peak 1: | 29.85        | 100.0     | 10.46          |
| Peak 2: | 0.000        | 0.0       | 0.000          |
| Peak 3: | 0.000        | 0.0       | 0.000          |

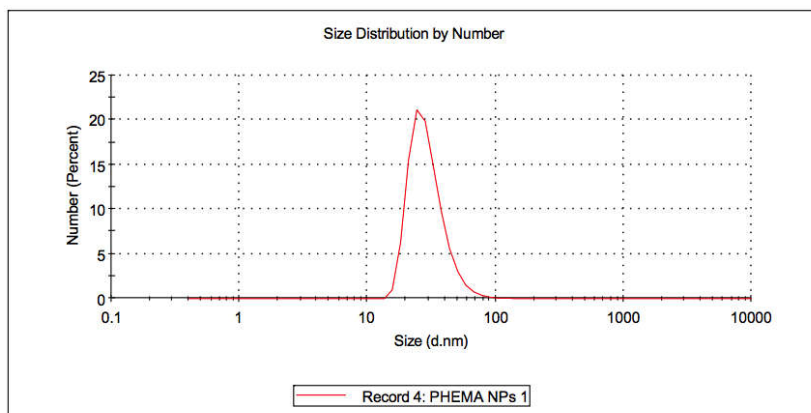

Figure 1. Zeta size analysis of PHEMA particles.

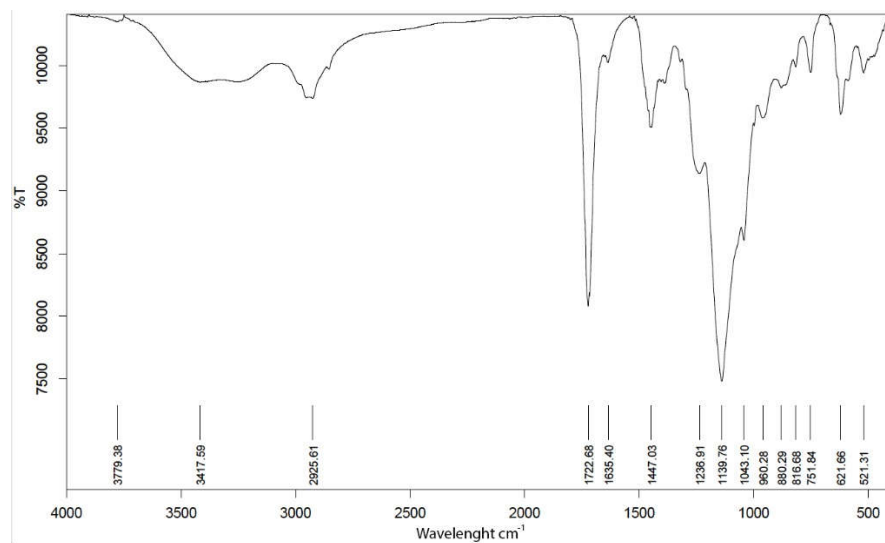

Figure S2. FTIR spectrum of nanoparticles.

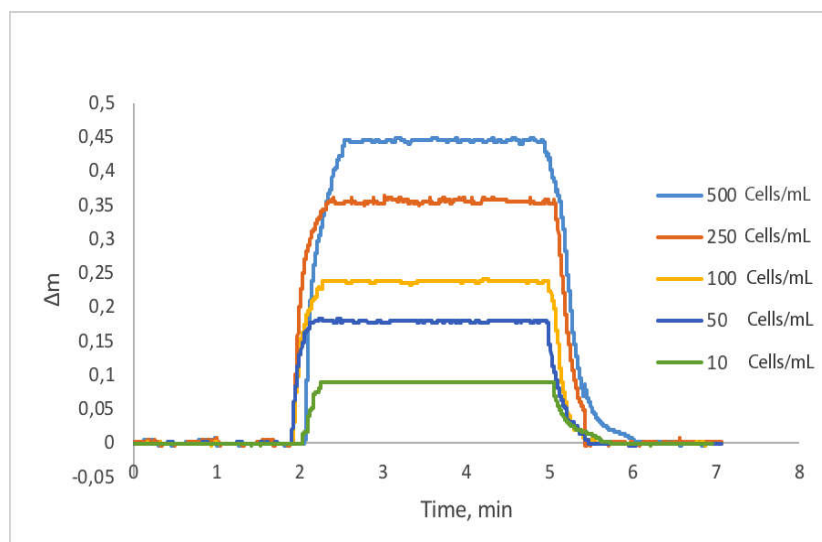

**Figure S3.** The increase in mass on the unit surface area (cells/cm<sup>2</sup>)
